# Supplementary material
Source: HighWire-hosted journal article supplement (https://bmjopenrespres.bmj.com/content/10/1/e001781)
Supplement: inline-supplementary-material-2 [file inline-supplementary-material-2.pdf]

## Appendix 2: Baseline characteristics of PTB patients in the primary and validation cohorts

| Characteristics                            | Primary Cohort | Validation Cohort | p-value |
|--------------------------------------------|----------------|-------------------|---------|
| n                                          | 1894           | 259               |         |
| TBTB, n (%)                                | 753 (39.8)     | 116 (44.8)        | 0.122   |
| EPTB, n (%)                                | 176 (9.3)      | 28 (10.8)         | 0.434   |
| Gender, n (%)                              |                |                   | 0.55    |
| Male                                       | 1001 (52.9)    | 142 (54.8)        |         |
| Female                                     | 893 (47.1)     | 117 (45.2)        |         |
| Age, n (%)                                 |                |                   | 0.097   |
| ≥ 60                                       | 202 (10.7)     | 31 (12)           |         |
| < 45                                       | 1218 (64.3)    | 149 (57.5)        |         |
| 45-59                                      | 474 (25)       | 79 (30.5)         |         |
| Smoker, n (%)                              |                |                   | 0.784   |
| No                                         | 1293 (68.3)    | 179 (69.1)        |         |
| Yes                                        | 601 (31.7)     | 80 (30.9)         |         |
| Underlying diseases, n (%)                 |                |                   |         |
| Diabetes                                   | 131 (6.9)      | 17 (6.6)          | 0.833   |
| Hypertension                               | 34 (1.8)       | 18 (6.9)          | < 0.001 |
| Anti-TB treatment history, n (%)           |                |                   | < 0.001 |
| 0 times                                    | 691 (36.5)     | 129 (49.8)        |         |
| ≥ 1times                                   | 1203 (63.5)    | 130 (50.2)        |         |
| Number of previous hospitalizations, n (%) |                |                   | < 0.001 |
| 0                                          | 888 (46.9)     | 53 (20.5)         |         |
| 1-2                                        | 918 (48.5)     | 170 (65.6)        |         |
| 3-4                                        | 66 (3.5)       | 24 (9.3)          |         |
| ≥ 5                                        | 22 (1.2)       | 12 (4.6)          |         |
| Symptoms, n (%)                            |                |                   |         |
| Cough                                      | 1387 (73.2)    | 181 (69.9)        | 0.256   |
| Sputum production                          | 637 (33.6)     | 91 (35.1)         | 0.632   |
| Tachypnea                                  | 292 (15.4)     | 53 (20.5)         | 0.038   |
| Hemoptysis                                 | 263 (13.9)     | 27 (10.4)         | 0.126   |
| Fever                                      | 278 (14.7)     | 36 (13.9)         | 0.739   |
| Chest pain                                 | 156 (8.2)      | 36 (13.9)         | 0.003   |
| Chest discomfort                           | 146 (7.7)      | 36 (13.9)         | < 0.001 |
| Night sweat                                | 79 (4.2)       | 22 (8.5)          | 0.002   |
| Duration of symptoms, n (%)                |                |                   | 0.007   |
| ≤ 4 weeks                                  | 520 (27.5)     | 92 (35.5)         |         |
| > 4 weeks                                  | 1374 (72.5)    | 167 (64.5)        |         |
| Pulmonary function test                    |                |                   | < 0.001 |
| Normal                                     | 564 (29.8)     | 128 (49.4)        |         |
| Abnormal                                   | 1330 (70.2)    | 131 (50.6)        |         |
| Chest CT manifestations                    |                |                   |         |
| Lung cavity                                | 468 (24.7)     | 63 (24.3)         | 0.893   |
| Atelectasis                                | 69 (3.6)       | 17 (6.6)          | 0.024   |

Abbreviations: PTB, pulmonary tuberculosis; TBTB, tracheobronchial tuberculosis; EPTB, extrapulmonary tuberculosis.
