# Supplementary material
Source: HighWire-hosted journal article supplement (https://bmjopenrespres.bmj.com/content/10/1/e001781)
Supplement: inline-supplementary-material-5 [file inline-supplementary-material-5.pdf]

|      |   |   |   |   |    |    |          |   |   |   |          |      |          |
|------|---|---|---|---|----|----|----------|---|---|---|----------|------|----------|
| 0.21 | 0 | 1 | 0 | 1 | 0  | 0  | 0.397571 | 0 | 1 | 0 | 0.602429 | None | 0.929861 |
| 0.22 | 0 | 1 | 0 | 1 | 0  | 0  | 0.397571 | 0 | 1 | 0 | 0.602429 | None | 11:39    |
| 0.23 | 0 | 1 | 0 | 1 | 0  | 0  | 0.397571 | 0 | 1 | 0 | 0.602429 | None | 1.011806 |
| 0.24 | 0 | 1 | 0 | 1 | 0  | 0  | 0.397571 | 0 | 1 | 0 | 0.602429 | None | 6:19     |
| 0.25 | 0 | 1 | 0 | 1 | 0  | 0  | 0.397571 | 0 | 1 | 0 | 0.602429 | None | 1:03     |
| 0.26 | 0 | 1 | 0 | 1 | 0  | 0  | 0.397571 | 0 | 1 | 0 | 0.602429 | None | 13:37    |
| 0.27 | 0 | 1 | 0 | 1 | 0  | 0  | 0.397571 | 0 | 1 | 0 | 0.602429 | None | 27:73    |
| 0.28 | 0 | 1 | 0 | 1 | 0  | 0  | 0.397571 | 0 | 1 | 0 | 0.602429 | None | 7:18     |
| 0.29 | 0 | 1 | 0 | 1 | 0  | 0  | 0.397571 | 0 | 1 | 0 | 0.602429 | None | 29:71    |
| 0.3  | 0 | 1 | 0 | 1 | 0  | 0  | 0.397571 | 0 | 1 | 0 | 0.602429 | None | 3:07     |
| 0.31 | 0 | 1 | 0 | 1 | 0  | 0  | 0.397571 | 0 | 1 | 0 | 0.602429 | None | 31:69    |
| 0.32 | 0 | 1 | 0 | 1 | 0  | 0  | 0.397571 | 0 | 1 | 0 | 0.602429 | None | 8:17     |
| 0.33 | 0 | 1 | 0 | 1 | 0  | 0  | 0.397571 | 0 | 1 | 0 | 0.602429 | None | 33:67    |
| 0.34 | 0 | 1 | 0 | 1 | 0  | 0  | 0.397571 | 0 | 1 | 0 | 0.602429 | None | 17:33    |
| 0.35 | 0 | 1 | 0 | 1 | 0  | 0  | 0.397571 | 0 | 1 | 0 | 0.602429 | None | 7:13     |
| 0.36 | 0 | 1 | 0 | 1 | 0  | 0  | 0.397571 | 0 | 1 | 0 | 0.602429 | None | 9:16     |
| 0.37 | 0 | 1 | 0 | 1 | 0  | 0  | 0.397571 | 0 | 1 | 0 | 0.602429 | None | 37:63    |
| 0.38 | 0 | 1 | 0 | 1 | 0  | 0  | 0.397571 | 0 | 1 | 0 | 0.602429 | None | 19:31    |
| 0.39 | 0 | 1 | 0 | 1 | 0  | 0  | 0.397571 | 0 | 1 | 0 | 0.602429 | None | 39:61    |
| 0.4  | 0 | 1 | 0 | 1 | 0  | 0  | 0.397571 | 0 | 1 | 0 | 0.602429 | None | 2:03     |
| 0.41 | 0 | 1 | 0 | 1 | 0  | 0  | 0.397571 | 0 | 1 | 0 | 0.602429 | None | 41:59:00 |
| 0.42 | 0 | 1 | 0 | 1 | 0  | 0  | 0.397571 | 0 | 1 | 0 | 0.602429 | None | 21:29    |
| 0.43 | 0 | 1 | 0 | 1 | 0  | 0  | 0.397571 | 0 | 1 | 0 | 0.602429 | None | 43:57:00 |
| 0.44 | 0 | 1 | 0 | 1 | 0  | 0  | 0.397571 | 0 | 1 | 0 | 0.602429 | None | 11:14    |
| 0.45 | 0 | 1 | 0 | 1 | 0  | 0  | 0.397571 | 0 | 1 | 0 | 0.602429 | None | 9:11     |
| 0.46 | 0 | 1 | 0 | 1 | 0  | 0  | 0.397571 | 0 | 1 | 0 | 0.602429 | None | 23:27    |
| 0.47 | 0 | 1 | 0 | 1 | 0  | 0  | 0.397571 | 0 | 1 | 0 | 0.602429 | None | 47:53:00 |
| 0.48 | 0 | 1 | 0 | 1 | 0  | 0  | 0.397571 | 0 | 1 | 0 | 0.602429 | None | 12:13    |
| 0.49 | 0 | 1 | 0 | 1 | 0  | 0  | 0.397571 | 0 | 1 | 0 | 0.602429 | None | 49:51:00 |
| 0.5  | 0 | 1 | 0 | 1 | 0  | 0  | 0.397571 | 0 | 1 | 0 | 0.602429 | None | 1:01     |
| 0.51 | 0 | 1 | 0 | 1 | 0  | 0  | 0.397571 | 0 | 1 | 0 | 0.602429 | None | 51:49:00 |
| 0.52 | 0 | 1 | 0 | 1 | 0  | 0  | 0.397571 | 0 | 1 | 0 | 0.602429 | None | 13:12    |
| 0.53 | 0 | 1 | 0 | 1 | 0  | 0  | 0.397571 | 0 | 1 | 0 | 0.602429 | None | 53:47:00 |
| 0.54 | 0 | 1 | 0 | 1 | 0  | 0  | 0.397571 | 0 | 1 | 0 | 0.602429 | None | 27:23:00 |
| 0.55 | 0 | 1 | 0 | 1 | 0  | 0  | 0.397571 | 0 | 1 | 0 | 0.602429 | None | 11:09    |
| 0.56 | 0 | 1 | 0 | 1 | 0  | 0  | 0.397571 | 0 | 1 | 0 | 0.602429 | None | 14:11    |
| 0.57 | 0 | 1 | 0 | 1 | 0  | 0  | 0.397571 | 0 | 1 | 0 | 0.602429 | None | 57:43:00 |
| 0.58 | 0 | 1 | 0 | 1 | 0  | 0  | 0.397571 | 0 | 1 | 0 | 0.602429 | None | 29:21:00 |
| 0.59 | 0 | 1 | 0 | 1 | 0  | 0  | 0.397571 | 0 | 1 | 0 | 0.602429 | None | 59:41:00 |
| 0.6  | 0 | 1 | 0 | 1 | 0  | 0  | 0.397571 | 0 | 1 | 0 | 0.602429 | None | 3:02     |
| 0.61 | 0 | 1 | 0 | 1 | 0  | 0  | 0.397571 | 0 | 1 | 0 | 0.602429 | None | 61:39:00 |
| 0.62 | 0 | 1 | 0 | 1 | 0  | 0  | 0.397571 | 0 | 1 | 0 | 0.602429 | None | 31:19:00 |
| 0.63 | 0 | 1 | 0 | 1 | 0  | 0  | 0.397571 | 0 | 1 | 0 | 0.602429 | None | 63:37:00 |
| 0.64 | 0 | 1 | 0 | 1 | 0  | 0  | 0.397571 | 0 | 1 | 0 | 0.602429 | None | 16:09    |
| 0.65 | 0 | 1 | 0 | 1 | 0  | 0  | 0.397571 | 0 | 1 | 0 | 0.602429 | None | 13:07    |
| 0.66 | 0 | 1 | 0 | 1 | 0  | 0  | 0.397571 | 0 | 1 | 0 | 0.602429 | None | 33:17:00 |
| 0.67 | 0 | 1 | 0 | 1 | 0  | 0  | 0.397571 | 0 | 1 | 0 | 0.602429 | None | 67:33:00 |
| 0.68 | 0 | 1 | 0 | 1 | 0  | 0  | 0.397571 | 0 | 1 | 0 | 0.602429 | None | 17:08    |
| 0.69 | 0 | 1 | 0 | 1 | 0  | 0  | 0.397571 | 0 | 1 | 0 | 0.602429 | None | 69:31:00 |
| 0.7  | 0 | 1 | 0 | 1 | 0  | 0  | 0.397571 | 0 | 1 | 0 | 0.602429 | None | 7:03     |
| 0.71 | 0 | 1 | 0 | 1 | 0  | 0  | 0.397571 | 0 | 1 | 0 | 0.602429 | None | 71:29:00 |
| 0.72 | 0 | 1 | 0 | 1 | 0  | 0  | 0.397571 | 0 | 1 | 0 | 0.602429 | None | 18:07    |
| 0.73 | 0 | 1 | 0 | 1 | 0  | 0  | 0.397571 | 0 | 1 | 0 | 0.602429 | None | 73:27:00 |
| 0.74 | 0 | 1 | 0 | 1 | 0  | 0  | 0.397571 | 0 | 1 | 0 | 0.602429 | None | 37:13:00 |
| 0.75 | 0 | 1 | 0 | 1 | 0  | 0  | 0.397571 | 0 | 1 | 0 | 0.602429 | None | 3:01     |
| 0.76 | 0 | 1 | 0 | 1 | 0  | 0  | 0.397571 | 0 | 1 | 0 | 0.602429 | None | 19:06    |
| 0.77 | 0 | 1 | 0 | 1 | 0  | 0  | 0.397571 | 0 | 1 | 0 | 0.602429 | None | 77:23:00 |
| 0.78 | 0 | 1 | 0 | 1 | 0  | 0  | 0.397571 | 0 | 1 | 0 | 0.602429 | None | 39:11:00 |
| 0.79 | 0 | 1 | 0 | 1 | 0  | 0  | 0.397571 | 0 | 1 | 0 | 0.602429 | None | 79:21:00 |
| 0.8  | 0 | 1 | 0 | 1 | 0  | 0  | 0.397571 | 0 | 1 | 0 | 0.602429 | None | 4:01     |
| 0.81 | 0 | 1 | 0 | 1 | 0  | 0  | 0.397571 | 0 | 1 | 0 | 0.602429 | None | 81:19:00 |
| 0.82 | 0 | 1 | 0 | 1 | 0  | 0  | 0.397571 | 0 | 1 | 0 | 0.602429 | None | 41:09:00 |
| 0.83 | 0 | 1 | 0 | 1 | 0  | 0  | 0.397571 | 0 | 1 | 0 | 0.602429 | None | 83:17:00 |
| 0.84 | 0 | 1 | 0 | 1 | 0  | 0  | 0.397571 | 0 | 1 | 0 | 0.602429 | None | 21:04    |
| 0.85 | 0 | 1 | 0 | 1 | 0  | 0  | 0.397571 | 0 | 1 | 0 | 0.602429 | None | 17:03    |
| 0.86 | 0 | 1 | 0 | 1 | 0  | 0  | 0.397571 | 0 | 1 | 0 | 0.602429 | None | 43:07:00 |
| 0.87 | 0 | 1 | 0 | 1 | 0  | 0  | 0.397571 | 0 | 1 | 0 | 0.602429 | None | 87:13:00 |
| 0.88 | 0 | 1 | 0 | 1 | 0  | 0  | 0.397571 | 0 | 1 | 0 | 0.602429 | None | 22:03    |
| 0.89 | 0 | 1 | 0 | 1 | 0  | 0  | 0.397571 | 0 | 1 | 0 | 0.602429 | None | 89:11:00 |
| 0.9  | 0 | 1 | 0 | 1 | 0  | 0  | 0.397571 | 0 | 1 | 0 | 0.602429 | None | 9:01     |
| 0.91 | 0 | 1 | 0 | 1 | 0  | 0  | 0.397571 | 0 | 1 | 0 | 0.602429 | None | 91:09:00 |
| 0.92 | 0 | 1 | 0 | 1 | 0  | 0  | 0.397571 | 0 | 1 | 0 | 0.602429 | None | 23:02    |
| 0.93 | 0 | 1 | 0 | 1 | 0  | 0  | 0.397571 | 0 | 1 | 0 | 0.602429 | None | 93:07:00 |
| 0.94 | 0 | 1 | 0 | 1 | 0  | 0  | 0.397571 | 0 | 1 | 0 | 0.602429 | None | 47:03:00 |
| 0.95 | 0 | 1 | 0 | 1 | 0  | 0  | 0.397571 | 0 | 1 | 0 | 0.602429 | None | 19:01    |
| 0.96 | 0 | 1 | 0 | 1 | 0  | 0  | 0.397571 | 0 | 1 | 0 | 0.602429 | None | 24:01:00 |
| 0.97 | 0 | 1 | 0 | 1 | 0  | 0  | 0.397571 | 0 | 1 | 0 | 0.602429 | None | 97:03:00 |
| 0.98 | 0 | 1 | 0 | 1 | 0  | 0  | 0.397571 | 0 | 1 | 0 | 0.602429 | None | 49:01:00 |
| 0.99 | 0 | 1 | 0 | 1 | 0  | 0  | 0.397571 | 0 | 1 | 0 | 0.602429 | None | 99:01:00 |
| 1    | 0 | 1 | 0 | 1 | NA | NA | 0.397571 | 0 | 1 | 0 | 0.602429 | None | Inf:1    |
